# Supplementary material
Source: PubMed Central journal article supplement (PMC4902623)
Supplement: supp_pp.16.00446_PP2016-00446R1_Supplemental_Material.pdf [file supp_pp.16.00446_PP2016-00446R1_Supplemental_Material.pdf]

**Supplemental Table 1.** Primers used for cloning and PCR amplification in this study

| <b>Target Gene</b>                                     |         | <b>Primer sequence</b>                                                                |
|--------------------------------------------------------|---------|---------------------------------------------------------------------------------------|
| <i>NATA1</i> (At2g39030)                               | forward | GGG GAC AAG TTT GTA CAA AAA AGC AGG<br>CTT CAT GGC GCC TCC AAC CGC AGC ACC A          |
|                                                        | reverse | GGG GAC CAC TTT GTA CAA GAA AGC TGG<br>GTC CTA GAT GTT TAG CTT GTC AAT AGC TTG<br>AAG |
| <i>NATA2</i> (At2g39020)                               | forward | GGG GAC AAG TTT GTA CAA AAA AGC AGG<br>CTT CAT GGC AGC CGC CGC ACC G                  |
|                                                        | reverse | GGG GAC CAC TTT GTA CAA GAA AGC TGG<br>GTC CTA GAT GTT GAC CTG ATC AAA AGC TTC        |
| <i>GFP</i> (from pMDC83)                               | forward | GGGG ACA AGT TTG TAC AAA AAA GCA GGC<br>TAA ATG AGT AAA GGA GAA GAA CTT TT            |
|                                                        | reverse | GGG GAC CAC TTT GTA CAA GAA AGC TGG<br>GTT TAG TGG TGG TGG TGG TG                     |
| <i>NATA1</i> promoter region<br>(for ecotype analysis) | forward | TAA GCT AAA GAA TTA AAG TAG TAA                                                       |
|                                                        | reverse | GAA GAT TAG GGT TTC GAG AAT CC                                                        |

**Supplemental Table 2.** Primers used for quantitative RT-PCR

| <b>Target Gene</b>                         |         | <b>Primer sequence</b>    |
|--------------------------------------------|---------|---------------------------|
| <i>EF1-<math>\alpha</math></i> (At5g60390) | forward | TGAGCACGCTCTTCTTGCTTTCA   |
|                                            | reverse | GGTGGTGGCATCCATCTTGTTACA  |
| <i>PR1</i> (At2g14610)                     | forward | TGATCCTCGTGGGAATTATGT     |
|                                            | reverse | TGCATGATCACATCATTACTTCAT  |
| <i>PR2</i> (At3g57260)                     | forward | AGCTTCCTTCTTCAACCACACAGC  |
|                                            | reverse | TGGCAAGGTATCGCCTAGCATC    |
| <i>PR3</i> (At3G54420)                     | forward | TCTAGCTTGAACGGTGGCTGTG    |
|                                            | reverse | CGTGCCATTAACGGTGCTTTGG    |
| <i>PR4</i> (At3G04720)                     | forward | TCCAAATCCAAGCCTCCGTTGC    |
|                                            | reverse | GCGGCAAGTGTTTAAGGGTGAAG   |
| <i>PR5</i> (At1G75040)                     | forward | AGCAATGCCGCTTGTGATGAAC    |
|                                            | reverse | ATCACCCACAGCACAGAGACAC    |
| <i>PR6</i> (At2G38900)                     | forward | ATACATGTCTAGCCGGCGGTTG    |
|                                            | reverse | TTGCTACCGGTTAGGGTTTGG     |
| <i>PAO1</i> (At5g13700)                    | forward | GCTCTAACATTCTGGTGGTGACG   |
|                                            | reverse | CCCAAACATGTCCTGAGAACAC    |
| <i>PAO2</i> (At2g43020)                    | forward | AGATTGTAGGATGCGAGTC       |
|                                            | reverse | TTAGACGATATAAGAAGAGG      |
| <i>PAO3</i> (At3g59050)                    | forward | ACAAACCTCACGACCTCTATG     |
|                                            | reverse | TCAAGCACACGCATCCTG        |
| <i>PAO4</i> (At1g65840)                    | forward | GGGAACAGTGACATTCTCGAAAC   |
|                                            | reverse | AATTGGAACCCTGCTTCTGTCTG   |
| <i>PAO5</i> (At4g29720)                    | forward | GATGACCTAGACGCAATG        |
|                                            | reverse | ATGAGTTGTGGAGTAATGG       |
| <i>NATA1</i> (At2g39030)                   | forward | AGCAGATGGGTGCGCAGGTT      |
|                                            | reverse | TCGCTCGATGGGTCTCATGCA     |
| <i>SPDS1</i> (AT1G23820)                   | forward | GAAGAGGATAACGGCGGC        |
|                                            | reverse | CAGAGAACCACCCAGGAATAACAG  |
| <i>SPDS2</i> (AT1G70310)                   | forward | TGATTTGCCCGTGAAGAGACC     |
|                                            | reverse | GAGAACCATCCAGGAATAATAGAGG |
| <i>SPMS</i> (AT5G53120)                    | forward | GTTGTTGGTGGAGGTGATGGTG    |
|                                            | reverse | GGATTTACGGAGGAACCTCAGCAG  |

**A**

At2g39030 (probe set 266142\_at)  
 NAT1\_Acyl-CoA N-acyltransferases (NAT) superfamily protein

BAR Arabidopsis eFP Browser 2.0  
<http://bar.utoronto.ca>

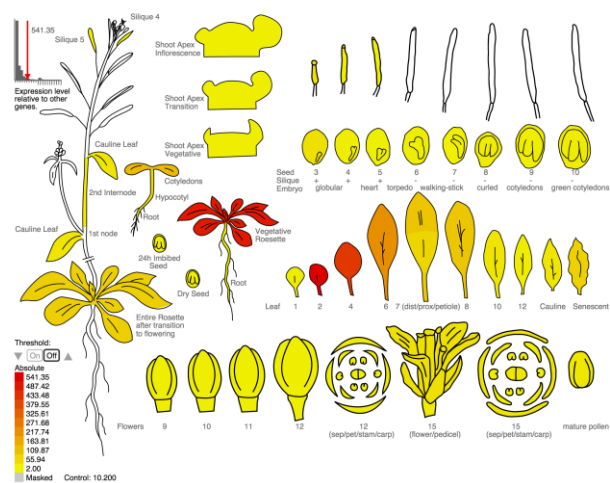**B**

At2g39020 (probe set 266189\_at)  
 Acyl-CoA N-acyltransferases (NAT) superfamily protein

BAR Arabidopsis eFP Browser 2.0  
<http://bar.utoronto.ca>

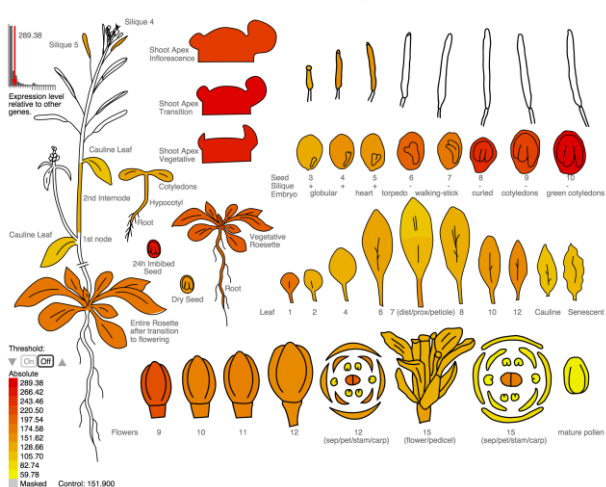

**Supplemental Figure S1.** Spatial and temporal expression of (A) *NATA1* and (B) *NATA2* from Botany Array Resource (<http://bar.utoronto.ca/welcome.htm>).

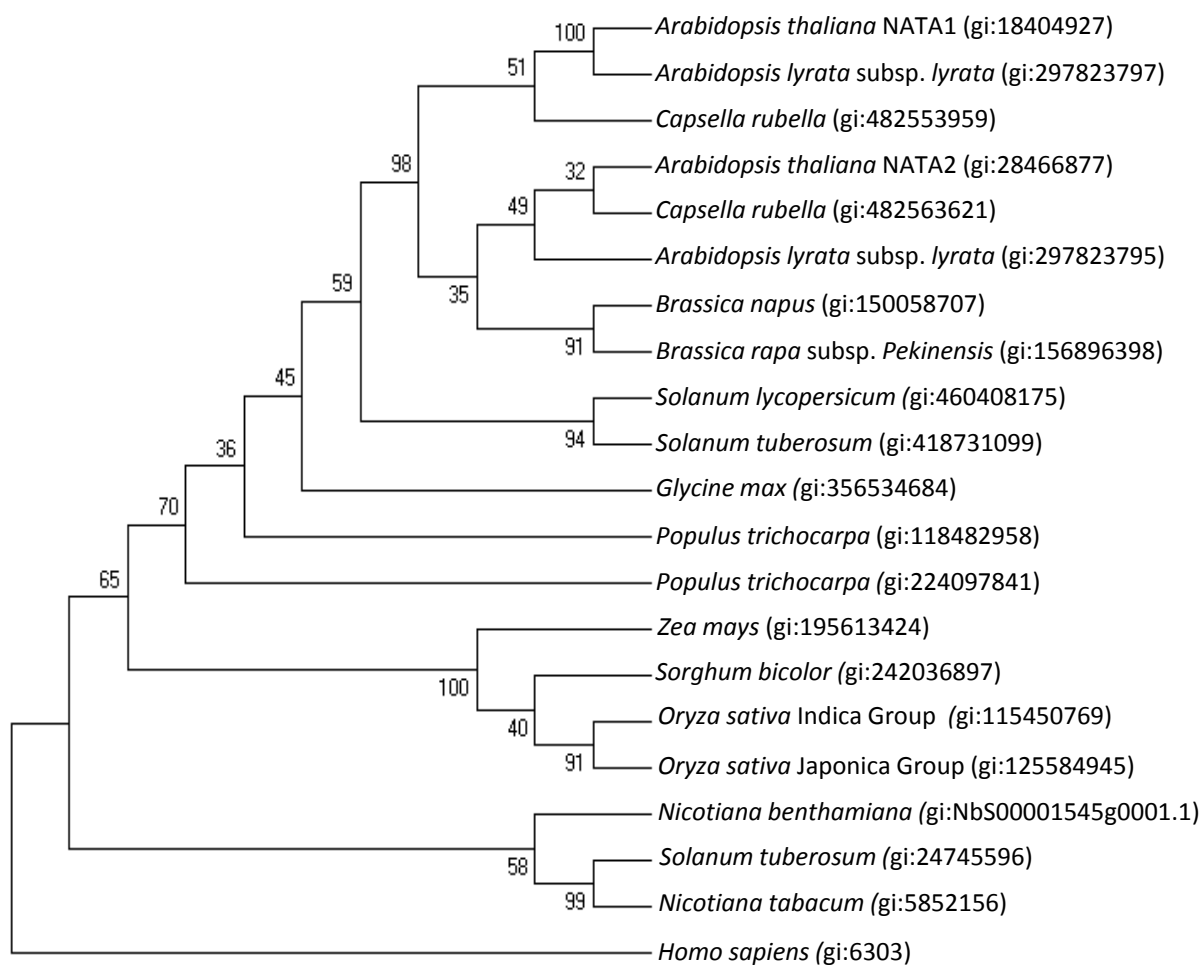

**Supplemental Figure S2.** Phylogenetic tree of plant proteins with similarity to polyamine acetyltransferases. Phylogenetic tree of NATA1 protein homologs. Human (*Homo sapiens*) spermidine/spermine  $N^1$ -acetyl-transferase (SSAT) was used as an outgroup. A consensus phylogenetic tree was produced with 1000 replicates. Values at the branch points indicate bootstrap percentages.

```

Mouse SSAT -----MAKFVIRPATAADCSDILRLIKELAKYFYMEE
At2g39030 -----MAPPTAAPEPNTV-PETSPTGHRMFSRIRLATPTDVPFIHKLIHQMAVFERLTH
At2g39020 MAAAAPPPPTAAPEPNMVAPLISPIGHMFSRIRLATPSDVPFIHKLIHQMAVFERLTH
                                     ** ** :* * :***::* :* : .

Mouse SSAT QVILTEKDLLEDGFGEHPFYHC-----LVAEVP--
At2g39030 Lfvatesglastlfnsrpfqavtvflleispspfpthd-asspdfppflethkvdldpie
At2g39020 LFSATESGLASTLFTSRPFQSFTVFLLEVSRSPFPATITSSPSDFTPPFKTHNLDLPID
.  ** . * . * . :** :**

Mouse SSAT ---KEHWTPE---GHSIVGFAMYYFTYDPWIGK-LLYLEDFVMSDYRGFGIGSEILKNL
At2g39030 DPdREKFLPDKLNDVVVAGFVLFPPNYPSFLAKQGFYIEDIFMREPYRRKGFGLLLTAV
At2g39020 DPESYNFSPDMLNDVVVAGFVLFPPNYSSFLSKPGFYIEDIFVREPYRRKGFGLSMLLTAV
. : * : : . ** . : : . * : : . * : * : * : * : . ** * : * . : * . :

Mouse SSAT SQVAMRCRCSSMHFLVAEWN E P S I N F Y K R R G A S D L S S E E G W R L F K I D K E Y L L K M A T E E -
At2g39030 AKQAVKLGvGRVEWIVIDWNVNAINFYEQMGAQVF---KEWRLCRLTGdALQAI dKLNI
At2g39020 AKQAVKMGYGRVEWVLDWNVNAIKFYEQMGAQIL---QEW RVCRLTGdALEAFDQVNI
: : * : : . : : : * : ** : * : * : : * * . : : * * : : : * : :

```

**Supplemental Figure S3.** Active site amino acid sequence alignment of Arabidopsis NATA1 and NATA2 with mouse spermidine/spermine acetyltransferase (SSAT; GI:6677849). Orange: CoA binding region, blue: spermine binding residues, and green: proposed catalytic site. Sequences were aligned with Clustal Omega (<http://www.clustal.org/omega/>).

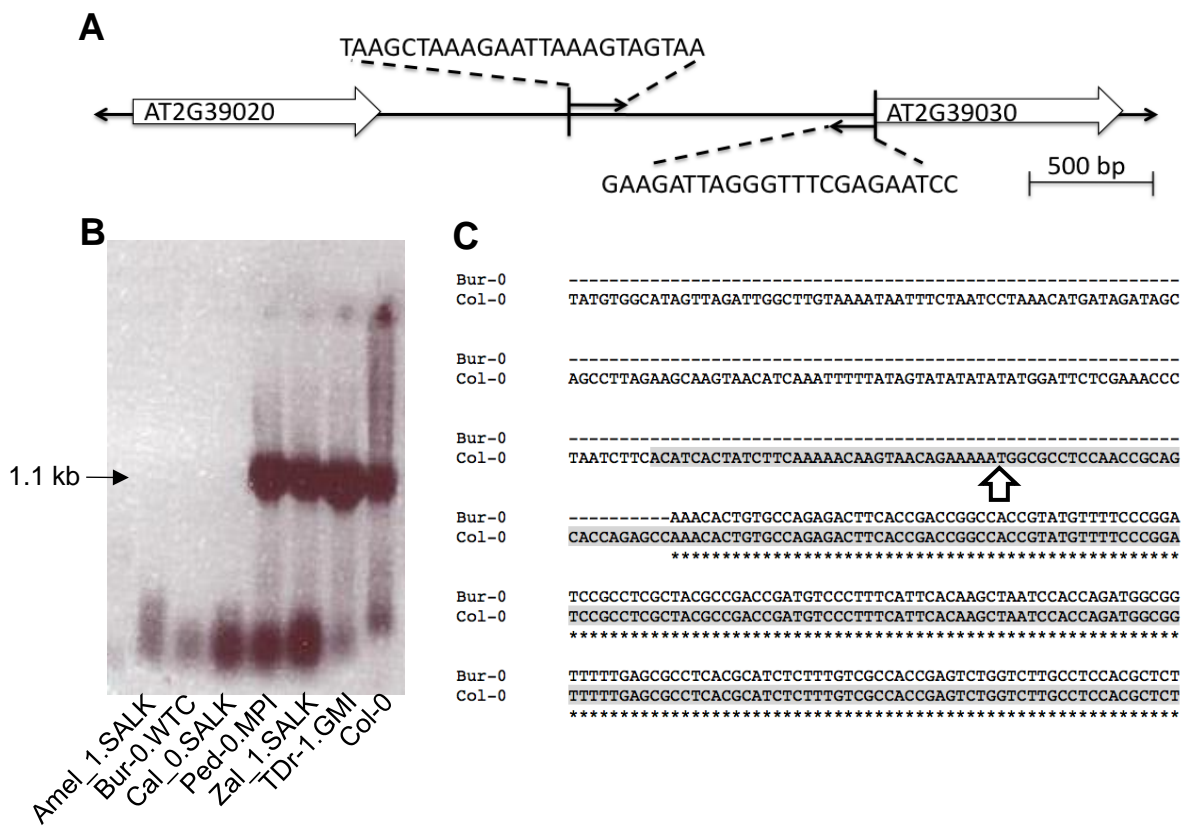

**Supplemental Figure S4.** Arabidopsis ecotypes with natural *nata1* knockout mutations were identified through the 1001 Genomes Project (<http://1001genomes.org/>). (A) *NATA1* (AT2G39030) promoter regions from the Amel-1, Bur-0, Cal-0, Ped-0, Zal-1, TDr-1 and Col-0 ecotypes were amplified with the indicated primers. (B) Agarose gel showing bands corresponding to the *NATA1* promoter regions of the indicated Arabidopsis ecotypes. (C) Sequence alignment of Chr2:16305177..16305536 from Bur-0 and Col-0. The *NATA1* transcript is marked in grey and the ATG translation start codon is indicated with an arrow. Sequences were aligned with Clustal Omega (<http://www.clustal.org/omega/>).

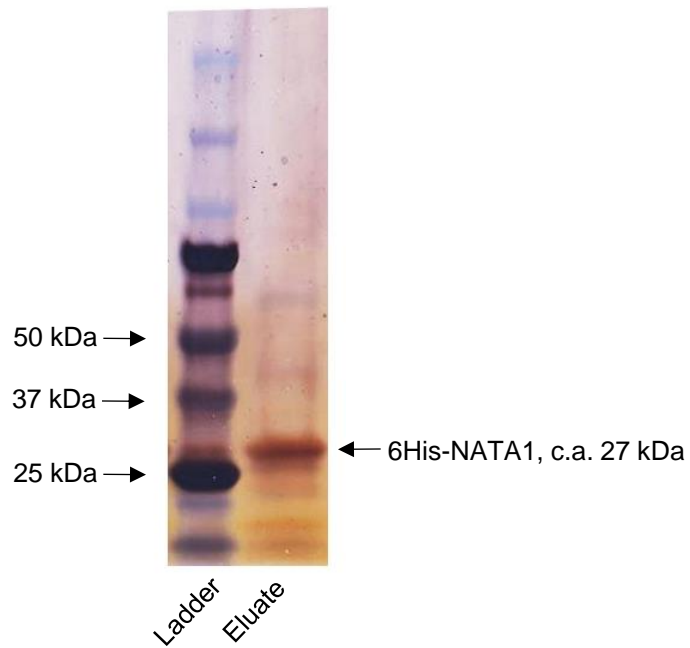

**Supplemental Figure S5.** Heterologously expressed NATA1 protein was purified with Ni-NTA and visualized using a silver-stained protein gel. Shown is a representative gel.

### A ornithine

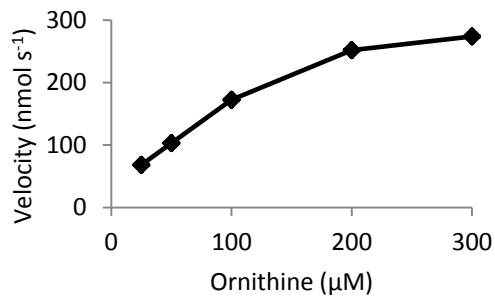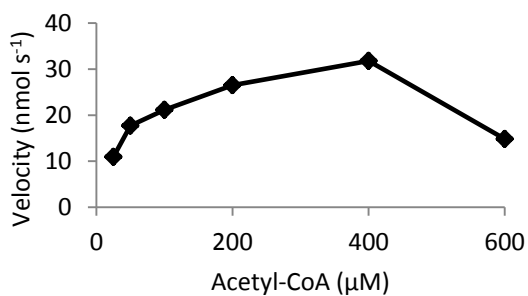

### B putrescine

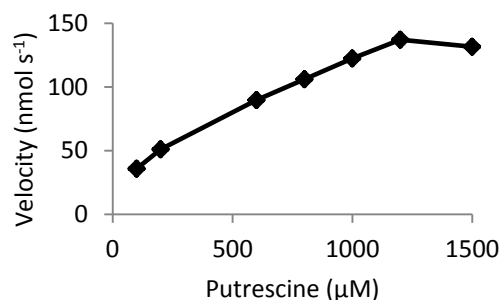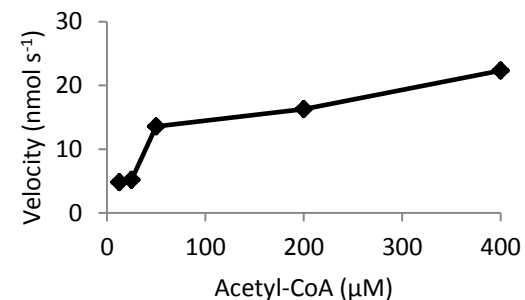

### C 1,3-diaminopropane

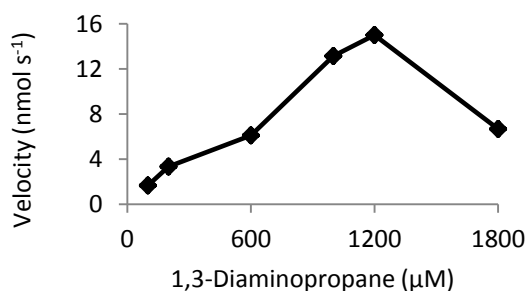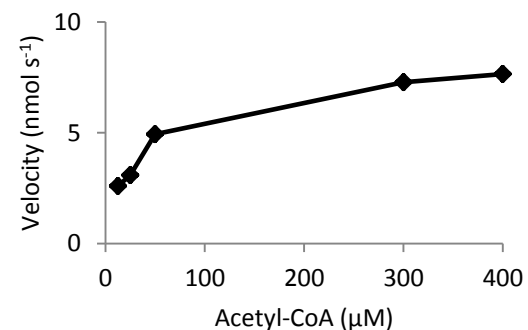

**Supplemental Figure S6.** Representative Michaelis Menten curves. The kinetics of heterologously expressed NATA1 were determined by Michaelis-Menten curves for (A) ornithine, (B) putrescine and (C) 1,3-diaminopropane by changing concentration of the potential substrate and acetyl-CoA, respectively. Shown are the means of three technical replicates.



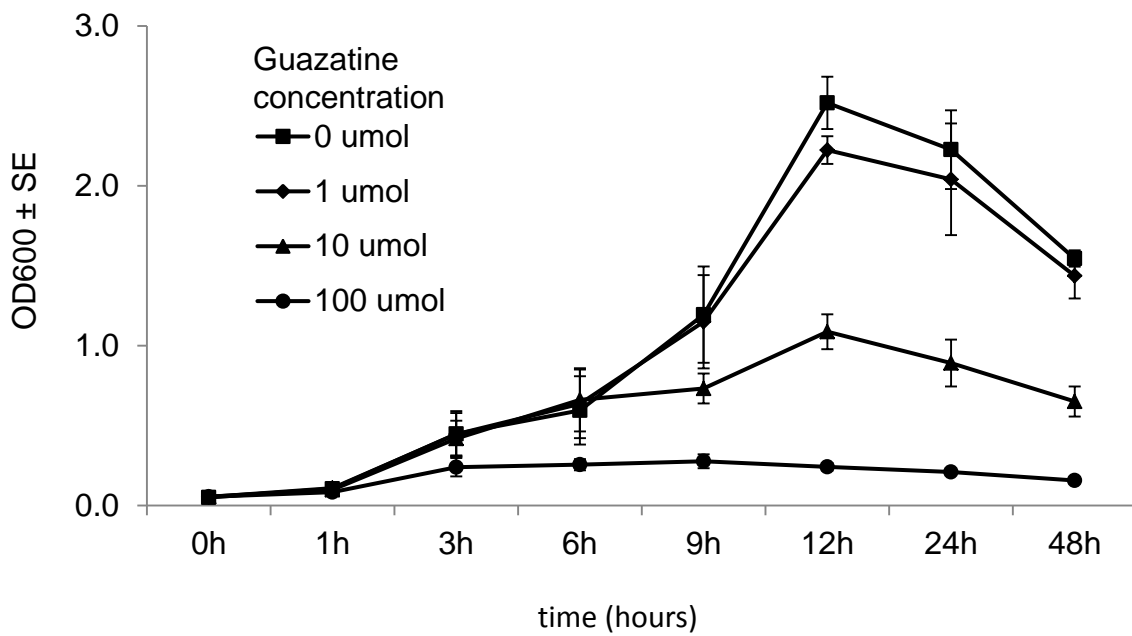

**Supplemental Figure S7.** Growth of *P. syringae* in LB medium supplemented with guazatine. Mean  $\pm$  SE of N =4.

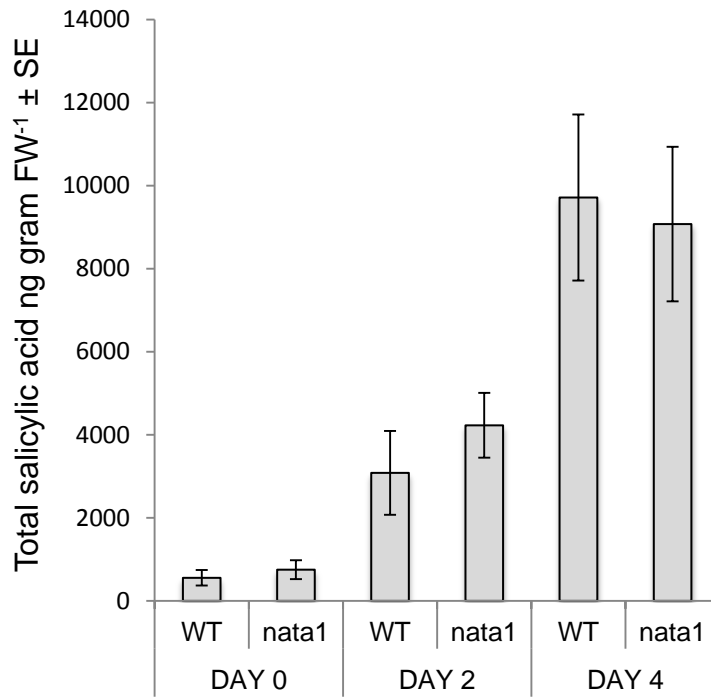

**Supplementary Figure S8.** Time course of total salicylic acid accumulation in response to *P. syringae* infection. Mean  $\pm$  SE of n = 12.
